# Supplementary material
Source: PubMed Central journal article supplement (PMC2396674)
Supplement: 0712306105_Supplemental_PDF.pdf [file 0712306105_Supplemental_PDF.pdf]

# Supporting Information

Liu *et al.* 10.1073/pnas.0712306105

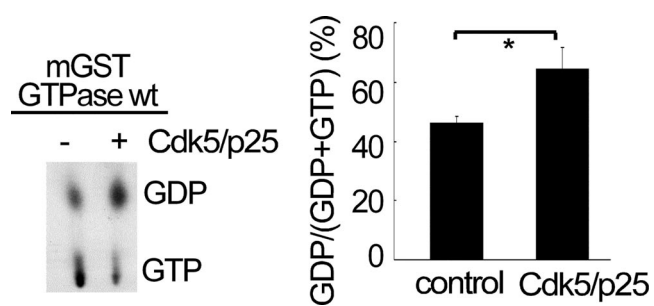

**Fig. S1.** Stimulation of PIKE-A GTPase activity by Cdk5 *in vitro*. mGST GTPase WT immunoprecipitated from HEK293 cells was phosphorylated by Cdk5/p25 complex *in vitro* with cold ATP and then analyzed for GTPase activity as described in Fig. 2.

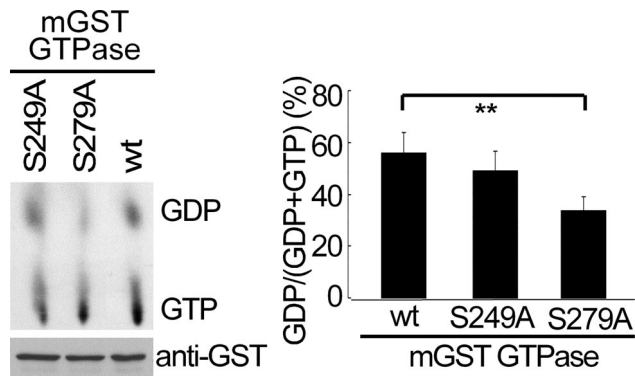

**Fig. S2.** Determination of GTPase activity in S249A and S279A mutants. GTPase WT, S249A, and S279A overexpressed in HEK293 cells were compared for their GTPase activity as described in Fig. 2.

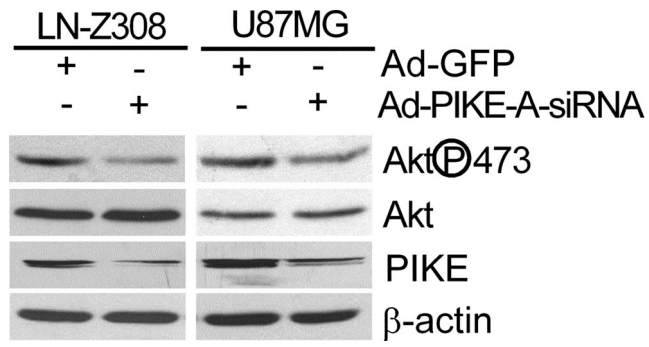

**Fig. S3.** The effect of knockdown of PIKE-A on phosphorylation of Akt. LN-Z308 and U87MG cells were infected with adenovirus expressing PIKE-A-siRNA or GFP control. Akt phosphorylation was determined by Western blot.

wt      S249A      S279A

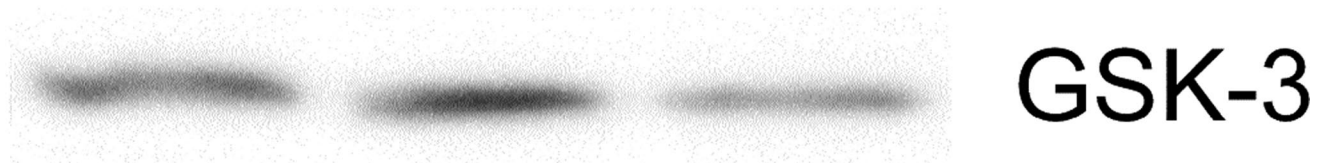

IP:anti-Akt, Akt kinase assay

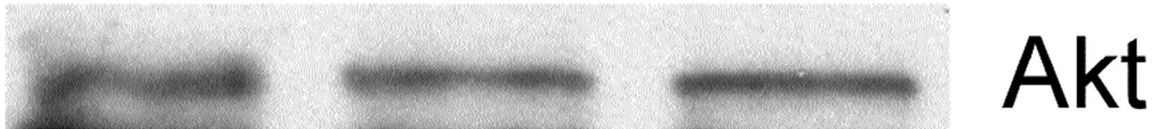

IB:anti-Akt after kinase assay

**Fig. S4.** The effects of S279A mutation on PIKE-A reduced Akt activity. After expression of indicated PIKE-A in HEK293, endogenous Akt activity was determined by an *in vitro* kinase assay.

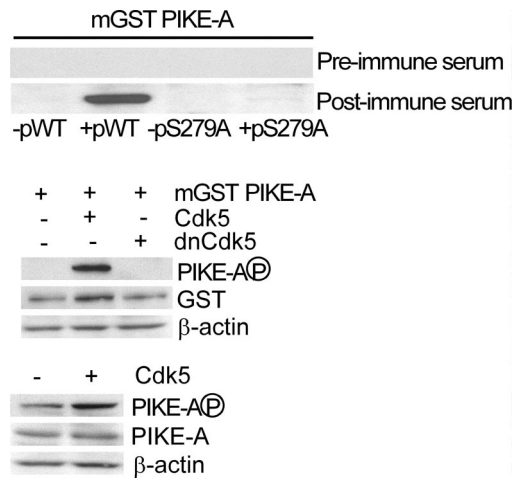

**Fig. S5.** Characterization of phospho S279 PIKE-A antibody *in vitro*. mGST PIKE-A or S279A mutant immunoprecipitated from HEK293 cells was phosphorylated by Cdk5 *in vitro* with cold ATP and analyzed by immunoblotting using preimmune or postimmune sera from a rabbit immunized with a peptide containing a phosphorylated serine residue corresponding to position 279. +p or -p, PIKE proteins either phosphorylated or unphosphorylated by Cdk5 *in vitro* (Top). (Middle) HEK293 cells were transfected with vectors as indicated. Phosphorylation of mGST PIKE-A was determined by phospho PIKE-A antibody. The membrane was reblotted for mGST PIKE-A and actin. (Bottom) Phosphorylation of endogenous PIKE-A was determined after overexpression of Cdk5/p25 in LN-Z308 cells.

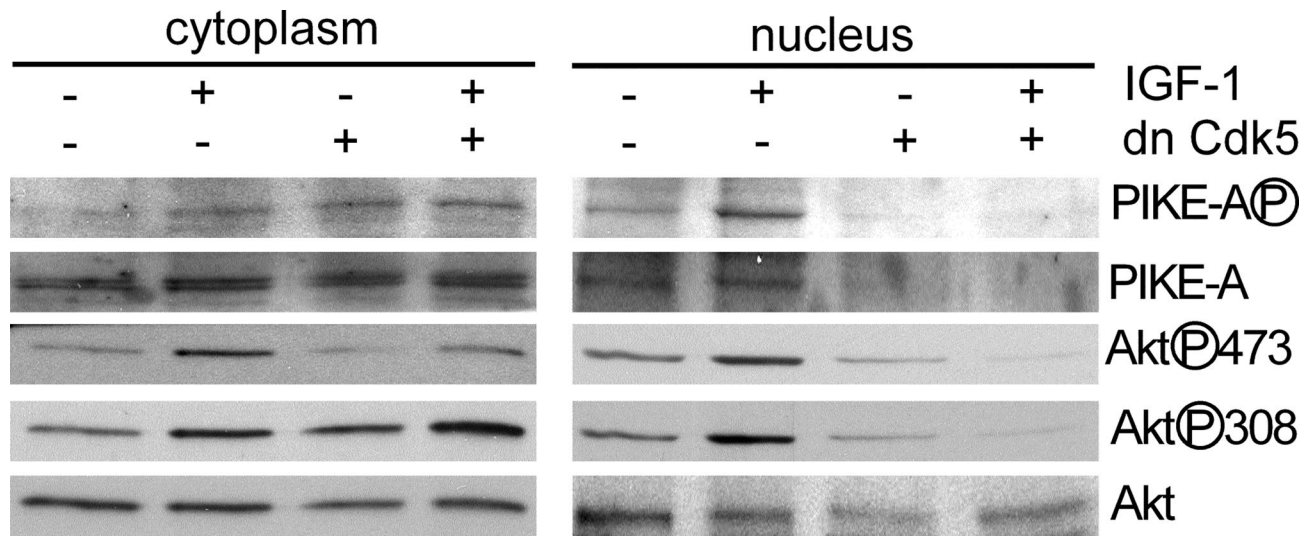

**Fig. 56.** Reduction of phospho PIKE-A and phospho Akt in the nucleus by dnCdk5. LN-Z308 cells were transfected with dnCdk5 and starved overnight and stimulated with IGF-1 as described in Fig. 4C. Cytoplasmic and nuclear fractions were prepared and assayed for various phospho signals and proteins.
